# Supplementary material for: Treatment Trends and Combined Methods in Removing Pharmaceuticals and Personal Care Products from Wastewater—A Review
Source: MDPI journal article supplement (doi:10.3390/membranes13020158), 2023-01-27
Supplement: s1 [file s1]

# **Treatment trends and combined methods in removing pharmaceuticals and personal care products from wastewater – a review**

**Paripurnanda Loganathan<sup>1</sup>, Saravanamuthu Vigneswaran<sup>1,2,\*</sup>, Jaya Kandasamy<sup>1</sup>, Agnieszka Katarzyna<sup>2</sup>, Zakhar Maletskyi<sup>2</sup>, Harsha Ratnaweera<sup>2</sup>**

<sup>1</sup> A Faculty of Engineering, University of Technology Sydney (UTS), P.O. Box 123, Broadway, NSW 2007, Australia

<sup>2</sup> Faculty of Sciences and Technology (RealTek), Norwegian University of Life Sciences, P.O. Box 5003, NO-1432 Ås, Norway

\* Correspondence: Saravanamuth.vigneswaran@uts.edu.au

**Table S1** Removal efficiency of PPCPs by biological treatment in wastewater treatment plants (WWTPs).

| Compounds                                   | Initial Conc (ng/l) | Treatment process                                                                                      | Removal Efficiency (%) | Reference |
|---------------------------------------------|---------------------|--------------------------------------------------------------------------------------------------------|------------------------|-----------|
| <b>Hormone</b>                              |                     |                                                                                                        |                        |           |
| Estriol                                     | 60                  | Primary treatment + conventional activated sludge                                                      | 66.8                   | [40]      |
| Estrone                                     | 57                  |                                                                                                        | 93.7                   | [40]      |
| <b>Antibiotics</b>                          |                     |                                                                                                        |                        |           |
| Sulfadiazine                                | 20-22               | Primary treatment + oxidation ditch + UV disinfection                                                  | 40-100                 | [98]      |
| <b>Nonsteroidal anti-inflammatory drugs</b> |                     |                                                                                                        |                        |           |
| Ibuprofen                                   | 4500                | Primary treatment + conventional activated sludge                                                      | 99.7                   | [40]      |
|                                             | 130-450             | Primary treatment + oxidation ditch + UV disinfection                                                  | 60-90                  | [98]      |
|                                             | 20-70               | Primary treatment + oxidation ditch + UV disinfection                                                  | 10-60                  | [98]      |
| Ketoprofen                                  | 70-220              | Primary treatment + conventional activated sludge + tertiary treatment (ultrafiltration and ozonation) | 0-80                   | [98]      |
| <b>Beta-blocker</b>                         |                     |                                                                                                        |                        |           |
| Atenolol                                    | 255                 | Primary treatment + primary sedimentation + bioreactor + clarifiers                                    | 47.1                   | [38]      |
| Metoprolol                                  | 379                 | Primary treatment                                                                                      | 52.9                   | [38]      |
| Propanolol                                  | 151                 | Grit tanks + primary sedimentation + bioreactor + clarifiers                                           | 49.9                   | [38]      |
| <b>Antidepressant</b>                       |                     |                                                                                                        |                        |           |
| Fluxetine                                   | 51.1                | Primary treatment + primary sedimentation + bioreactor + clarifiers                                    | 68.2                   | [38]      |

Modified from: Wang and Wang, [6].

**Table S2** The removal of PPCPs by activated carbon.

| Compounds                                   | PAC Dose (mg/l) | Initial Conc (ng/l, except specified otherwise) | Source Water    | q <sub>m</sub> (mg/g) | Removal Efficiency (%) | Reference |
|---------------------------------------------|-----------------|-------------------------------------------------|-----------------|-----------------------|------------------------|-----------|
| <b>Hormone</b>                              |                 |                                                 |                 |                       |                        |           |
| Estriol                                     | 5               | 100                                             | Surface water   | n.a.                  | ~60                    | [99]      |
| Estrone                                     | 5               | 100                                             | Surface water   | n.a.                  | ~72                    | [99]      |
| Estradiol                                   | 5               | 100                                             | Surface water   | n.a.                  | ~80                    | [99]      |
| <b>Antibiotics</b>                          |                 |                                                 |                 |                       |                        |           |
| Sulfamethoxazole                            | 5               | 100                                             | Surface water   | n.a.                  | ~35                    | [99]      |
|                                             | 50              | 600                                             | WWTPs effluents | n.a.                  | ~60                    | [100]     |
| Trimethoprim                                | 5               | 100                                             | Surface water   | n.a.                  | ~75                    | [99]      |
| <b>Liquid Regulator</b>                     |                 |                                                 |                 |                       |                        |           |
| Bezafibrate                                 | 50              | 1.3 µg/l                                        | WWTPs effluents | n.a.                  | ~90                    | [100]     |
| Gemfibrozil                                 | 5               | 100                                             | Surface water   | n.a.                  | ~37                    | [99]      |
| <b>Nonsteroidal anti-inflammatory drugs</b> |                 |                                                 |                 |                       |                        |           |
| Ibuprofen                                   | 5               | 100                                             | Surface water   | n.a.                  | ~15                    | [99]      |
| Diclofenac                                  | 5               | 100                                             | Surface water   | n.a.                  | ~40                    | [99]      |
|                                             | 50              | 5.8 µg/l                                        | WWTPs effluents | n.a.                  | ~80                    | [100]     |
| Paracetamol                                 | 5               | 100                                             | Surface water   | n.a.                  | ~70                    | [99]      |
| Naproxen                                    | 5               | 100                                             | Surface water   | n.a.                  | ~50                    | [99]      |
| <b>Antidepressant</b>                       |                 |                                                 |                 |                       |                        |           |
| Diazepam                                    | 5               | 100                                             | Surface water   | n.a.                  | ~65                    | [99]      |
| <b>Anticonvulsants</b>                      |                 |                                                 |                 |                       |                        |           |
| Carbamazepine                               | 5               | 100                                             | Surface water   | n.a.                  | ~70                    | [99]      |

Modified from: Wang and Wang, [6].

**Table S3** The removal of PPCPs by graphene and graphene oxide.

| Compounds                                   | Graphene Type              | Initial Conc (mg/L) | Source Water    | q <sub>m</sub> (mg/g) | Removal Efficiency (%) | Reference |
|---------------------------------------------|----------------------------|---------------------|-----------------|-----------------------|------------------------|-----------|
| <b>Antibiotics</b>                          |                            |                     |                 |                       |                        |           |
| Sulfameth-oxazole                           | Graphene nanosheet (1 g/l) | 100 - 200           | Synthetic water | 103                   | n.a.                   | [101]     |
|                                             | Graphene nanosheet (1 g/l) | 100 - 200           | Synthetic water | 122                   | n.a.                   | [101]     |
| <b>Nonsteroidal anti-inflammatory drugs</b> |                            |                     |                 |                       |                        |           |
| Ibuprofen                                   | Graphene                   | 10                  | Synthetic water | n.a.                  | 95.5                   | [102]     |
| Diclofenac                                  | Graphene                   | 10                  | Synthetic water | n.a.                  | 97                     | [102]     |
| <b>Beta-blocker</b>                         |                            |                     |                 |                       |                        |           |
| Atenolol                                    | Graphene oxide (1 g/l)     | 60                  | Synthetic water | 55.49                 | n.a.                   | [103]     |
| Propanolol                                  | Graphene oxide (1 g/l)     | 60                  | Synthetic water | 42.48                 | n.a.                   | [103]     |
| Carbamazepine                               | Graphene                   | 10                  | Synthetic water | n.a.                  | 97                     | [102]     |

Modified from: Wang and Wang, [6].

**Table S4** Fenton oxidation of PPCPs.

| Compounds                                   | Initial conc. | Source water                    | Conditions                                                                                                | Removal efficiency (%) | References |
|---------------------------------------------|---------------|---------------------------------|-----------------------------------------------------------------------------------------------------------|------------------------|------------|
| <b>Antibiotics</b>                          |               |                                 |                                                                                                           |                        |            |
| Ofloxacin                                   | 0.0277 mmol/l | Waste water                     | 25°C, pH2.8-3.2, 120 min, Fe <sup>2+</sup> - 5 mg/l, H <sub>2</sub> O <sub>2</sub> - 2.714 mM             | 100                    | 104        |
| <b>Lipid regulator</b>                      |               |                                 |                                                                                                           |                        |            |
| Bezafibrate                                 | 0.055 mM      | Waste water                     | Photo-Fenton, room temp, pH2.5, 10 min, Fe <sup>2+</sup> - 0.2 mM, H <sub>2</sub> O <sub>2</sub> - 5.0 mM | 100                    | 105        |
| <b>Nonsteroidal anti-inflammatory drugs</b> |               |                                 |                                                                                                           |                        |            |
| Ibuprofen                                   | 0.87 µM       | Water                           | Fenton, 30°C, pH3, 2 h, Fe <sup>2+</sup> - 1.2 mM, H <sub>2</sub> O <sub>2</sub> - 0.32 mM                | >50                    | 106        |
| Diclofenac                                  | 0.17 mM       | Ultrapure Water                 | 25°C, pH3, 12 h, Pyrite- 0.5-4.0mM, H <sub>2</sub> O <sub>2</sub> - 1.0mM                                 | >85                    | 107        |
|                                             | 33.4 mg/l     | Distilled water/<br>Waste water | pH5-8, 15 min, ammonium Fe <sup>3+</sup> citrate complex- 0.2mM, H <sub>2</sub> O <sub>2</sub> -68 mM     | 20-100                 | 108        |
|                                             | 50 mg/l       | Demineral-ized water            | 20-40°C, pH7, Fe <sup>2+</sup> - 0.05mM, H <sub>2</sub> O <sub>2</sub> - 200-400mg/l                      | 100                    | 109        |
| Paracetamol                                 | 100 mg/l      | Water                           | 60°C, pH2.6, 5 h, magnetite- 6 g/l, H <sub>2</sub> O <sub>2</sub> - 28mM                                  | 100                    | 110        |
| Naproxen                                    | 20 mg/l       | Water                           | 28-33 °C, pH3, 10min, Fe <sup>2+</sup> - 4.83 mg/l, H <sub>2</sub> O <sub>2</sub> -9.98 mM                | 100                    | 111        |
| Salicylic acid                              | 4 mM          | Double distilled water          | 20°C, pH3.0, 60 min, Fe <sup>2+</sup> - 3.2 mM; H <sub>2</sub> O <sub>2</sub> - 12.8 mM                   | 100                    | 112        |
| <b>Beta Blocker</b>                         |               |                                 |                                                                                                           |                        |            |
| Atenolol I                                  | 20 mg/l       | Ultrapure Water                 | 35°C, pH7, 150 min, Fe <sup>2+</sup> - 5 mg/l, H <sub>2</sub> O <sub>2</sub> - 100 mg/l                   | 100                    | 113        |
| Metoprolol                                  | 20 mg/l       | Ultrapure Water                 | 35°C, pH7, 150 min, Fe <sup>2+</sup> - 2.8 mg/l, H <sub>2</sub> O <sub>2</sub> - 95 mg/l                  | 100                    | 113        |
| <b>Anticonvulsants</b>                      |               |                                 |                                                                                                           |                        |            |
| Carbamazepine                               | 42 µM         | Double distilled water          | 21°C, pH5, 1 h, Fe <sub>0</sub> - 10 mg H <sub>2</sub> O <sub>2</sub> - 10 ml                             | 90                     | 114        |
|                                             | 100 mg/l      | Waste water                     | Room temp, pH3, 180 min, Fe <sup>2+</sup> -0.016 mM, H <sub>2</sub> O <sub>2</sub> -0.8 mM                | >90                    | 115        |
|                                             | 60.35 µM      | Ultrapure Water                 | 23°C, pH7.0, 120 min, Fe <sub>3</sub> O <sub>4</sub> -1.0 g/l, H <sub>2</sub> O <sub>2</sub> -100mM       | 100                    | 116        |

Modified from: Wang and Wang, [6].

**Table S5** Photo-Fenton oxidation of PPCPs.

| Compounds                                   | Initial conc.    | Source water                                        | Conditions                                                                                        | Removal efficiency (%) | References |
|---------------------------------------------|------------------|-----------------------------------------------------|---------------------------------------------------------------------------------------------------|------------------------|------------|
| <b>Antibiotics</b>                          |                  |                                                     |                                                                                                   |                        |            |
| Tylosin                                     | 100 mg/l         | Ultrapure water                                     | Electro-Fenton, pH3.0, 15 min, $\text{Fe}^{3+}$ - 0.1 mM, I- 300 mA                               | N.A                    | [117]      |
| Enoxacin                                    | 50 mg/l          | Ultrapure water                                     | Electro-Fenton, 18°C, pH3.0, 60 min, $\text{Fe}^{2+}$ - 0.2 mM, I- 300 mA                         | >90                    | [118]      |
| <b>Lipid regulator</b>                      |                  |                                                     |                                                                                                   |                        |            |
| Clorfibric acid                             | 179 mg/l         | Pure Water                                          | Electro-Fenton, 35°C, pH3.0, 12 min, $\text{Fe}^{2+}$ - 1.0 mM, I- 100 mA                         | 100                    | [119]      |
| <b>Nonsteroidal anti-inflammatory drugs</b> |                  |                                                     |                                                                                                   |                        |            |
| Ibuprofen                                   | 0.87 mM          | Water                                               | Photo-Fenton, 30°C, pH3, 2 h, $\text{Fe}^{2+}$ - 1.2 mM, $\text{H}_2\text{O}_2$ - 0.32 mM         | 100                    | [106]      |
|                                             | 100 mg/l         | Synthetic water/<br>Simulated water/<br>Waste water | Photo-Fenton, 37°C pH7.6, 90 min, $\text{Fe}^{2+}$ - 5 mg/l, $\text{H}_2\text{O}_2$ -50 mg/l      | 100                    | [120]      |
| Diclofenac                                  | 50 mg/l          | Demineral-ized water                                | 20-40°C, pH7, $\text{Fe}^{2+}$ - 0.05mM, $\text{H}_2\text{O}_2$ - 200-400mg/l                     | 100                    | [109]      |
| Paracetamol                                 | 100 mg/l         | Water                                               | 60°C, pH2.6, 5 h, magnetite- 6 g/l, $\text{H}_2\text{O}_2$ - 28mM                                 | 100                    | [110]      |
| Salicylic acid                              | 4 mM             | Double distilled water                              | Photo-Fenton, 20°C, pH3.0, 60 min, $\text{Fe}^{3+}$ - 0.5 mM; $\text{H}_2\text{O}_2$ - 10mM       | 82                     | [112]      |
| <b>Beta Blocker</b>                         |                  |                                                     |                                                                                                   |                        |            |
| Metoprolol                                  | 0.246 mM         | Ultrapure Water                                     | Electro-Fenton, 35°C, pH3.0, 6 h, $\text{Fe}^{2+}$ - 0.5 mM, $\text{Cu}^{2+}$ - 0.1 mM, I- 120 mA | 100                    | [121]      |
| <b>Anticonvulsants</b>                      |                  |                                                     |                                                                                                   |                        |            |
| Carbamazepine                               | 50 $\mu\text{M}$ | Ultrapure Water                                     | Photo-Fenton, 25°C, pH8.4, 30 min, $\text{Fe}^{2+}$ - 0.1 mM, Persulphate- 0.2 mM                 | 100                    | [122]      |

Modified from: Wang and Wang, [6].

**Table S6** UV/hydrogen peroxide treatment of PPCPs in wastewaters.

| Compounds                                   | Initial conc. | Source water    | Conditions                                                                                     | Removal efficiency (%) | References |
|---------------------------------------------|---------------|-----------------|------------------------------------------------------------------------------------------------|------------------------|------------|
| <b>Antibiotics</b>                          |               |                 |                                                                                                |                        |            |
| Sulfamethoxazole                            | 120 ng/l      | Waste water     | 2768 mJ/cm <sup>2</sup> ; room temp, pH6.5, H <sub>2</sub> O <sub>2</sub> - 1.72 g/l.15 min    | 100                    | [74]       |
|                                             | 578 ng/l      | Waste water     | 550 w/m <sup>2</sup> , 17 °C, pH2.5, H <sub>2</sub> O <sub>2</sub> - 50 mg/l, 30 min           | 100                    | [123]      |
| Trimethoprim                                | ~95 ng/l      | Waste water     | 2768 mJ/cm <sup>2</sup> ; room temp, pH6.5, H <sub>2</sub> O <sub>2</sub> - 1.72 g/l.15 min    | 100                    | [74]       |
|                                             | 131 ng/l      | Waste water     | 550 w/m <sup>2</sup> , 17 °C, pH2.5, H <sub>2</sub> O <sub>2</sub> - 50 mg/l, 30 min           | 100                    | [123]      |
| Amoxicillin                                 | 25 mg/l       | Distilled water | 2.3 w/cm <sup>2</sup> , 40 °C, pH7.0, H <sub>2</sub> O <sub>2</sub> - 588 mg/l, 67 min, 10 rpm | ~90                    | [124]      |
| Erythromycin                                | 110 ng/l      | Waste water     | 2768 mJ/cm <sup>2</sup> ; room temp, pH6.5, H <sub>2</sub> O <sub>2</sub> - 1.72 g/l.15 min    | ~98                    | [74]       |
| Ofloxacin                                   | 41 ng/l       | Waste water     | 550 w/m <sup>2</sup> , 17°C, pH2.5, H <sub>2</sub> O <sub>2</sub> - 50 mg/l, 30 min 100        |                        | [123]      |
| Ciprofloxacin                               | 129 ng/l      | Waste water     | 550 w/m <sup>2</sup> , 17°C, pH2.5, H <sub>2</sub> O <sub>2</sub> - 50 mg/l, 30 min            | 100                    | [123]      |
| Tetracycline                                | ~70 ng/l      | Waste water     | 2768 mJ/cm <sup>2</sup> ; room temp, pH6.5, H <sub>2</sub> O <sub>2</sub> - 1.72 g/l.15 min    | ~99                    | [74]       |
| <b>Lipid regulator</b>                      |               |                 |                                                                                                |                        |            |
| Bezafibrate                                 | 120 ng/l      | Waste water     | 2768 mJ/cm <sup>2</sup> ; room temp, pH6.5, H <sub>2</sub> O <sub>2</sub> - 1.72 g/l, 15 min   | 100                    | [74]       |
|                                             | 426 ng/l      | Waste water     | 550 w/m <sup>2</sup> , 17°C, pH2.5, H <sub>2</sub> O <sub>2</sub> - 50 mg/l, 30 min            | 100                    | [123]      |
| Gemfibrozil                                 | 25 ng/l       | Waste water     | 550 w/m <sup>2</sup> , 17°C, pH2.5, H <sub>2</sub> O <sub>2</sub> - 50 mg/l, 30 min            | >100                   | [123]      |
| <b>Nonsteroidal anti-inflammatory drugs</b> |               |                 |                                                                                                |                        |            |
| Ibuprofen                                   | 112 ng/l      | Waste water     | 550 w/m <sup>2</sup> , 17°C, pH2.5, H <sub>2</sub> O <sub>2</sub> - 50 mg/l, 30 min            | 100                    | [123]      |
| Diclofenac                                  | ~90 ng/l      | Waste water     | 2768 mJ/cm <sup>2</sup> ; room temp, pH6.5, H <sub>2</sub> O <sub>2</sub> - 1.72 g/l.15 min    | 100                    | [74]       |
|                                             | 518 ng/l      | Waste water     | 550 w/m <sup>2</sup> , 17°C, pH2.5, H <sub>2</sub> O <sub>2</sub> - 50 mg/l, 30 min            | 100                    | [123]      |
| Naproxen                                    | 178 ng/l      | Waste water     | 550 w/m <sup>2</sup> , 17°C, pH2.5, H <sub>2</sub> O <sub>2</sub> - 50 mg/l, 30 min            | 100                    | [123]      |
| Acetaminophen                               | ~9 ng/l r     | Waste water     | 2768 mJ/cm <sup>2</sup> ; room temp, pH6.5, H <sub>2</sub> O <sub>2</sub> - 1.72 g/l.15 min    | ~90                    | [74]       |
| Ketoprofen                                  | 100 ng/l      | Waste water     | 2768 mJ/cm <sup>2</sup> ; room temp, pH6.5, H <sub>2</sub> O <sub>2</sub> - 1.72 g/l.15 min    | 100                    | [74]       |
| Carbamazepine                               | ~95 ng/l      | Waste water     | 2768 mJ/cm <sup>2</sup> ; room temp, pH6.5, H <sub>2</sub> O <sub>2</sub> - 1.72 g/l.15 min    | 100                    | [74]       |
|                                             | 263 ng/l      | Waste water     | 550 w/m <sup>2</sup> , 17 °C, pH2.5, H <sub>2</sub> O <sub>2</sub> - 50 mg/l, 30 min           | 100                    | [123]      |

|           |          |             |                                                                                             |     |       |
|-----------|----------|-------------|---------------------------------------------------------------------------------------------|-----|-------|
| Primidone | ~80 ng/l | Waste water | 2768 mJ/cm <sup>2</sup> ; room temp, pH6.5, H <sub>2</sub> O <sub>2</sub> - 1.72 g/l.15 min | 100 | [74]  |
|           | 49 ng/l  | Waste water | 550 w/m <sup>2</sup> , 17°C, pH2.5, H <sub>2</sub> O <sub>2</sub> - 50 mg/l, 30 min         | 100 | [123] |

Modified from: Wang and Wang, [6].



**Table S7** Removal efficiency of combined treatment technologies for pharmaceuticals

| Pharmaceutical                       | UF           | GAC  | PAC    | BAF  | Ozone  | PAC-UF | Ozone-BAF | UF-BAF |
|--------------------------------------|--------------|------|--------|------|--------|--------|-----------|--------|
| Azithromycin                         | No treatment | >80% | >80%   | >80% | <20%   | >80%   | >80%      | >80%   |
| Ciprofloxacin                        |              | >80% | >80%   | >80% | 20-80% | >80%   | >80%      | >80%   |
| Clarithromycin                       |              | >80% | >80%   | >80% | <20%   | >80%   | >80%      | >80%   |
| Diclofenac                           |              | >80% | >80%   | >80% | >80%   | >80%   | >80%      | >80%   |
| E2 (17 $\beta$ -estradiol)           |              | >80% | >80%   | >80% | >80%   | >80%   | >80%      | >80%   |
| EE2 (17 $\alpha$ -ethinyl estradiol) |              | >80% | >80%   | >80% | >80%   | >80%   | >80%      | >80%   |
| Erythromycin                         |              | >80% | >80%   | >80% | <20%   | >80%   | >80%      | >80%   |
| Ibuprofen                            |              | >80% | >80%   | >80% | 20-80% | >80%   | >80%      | >80%   |
| Carbamazepine                        |              | >80% | >80%   | >80% | >80%   | >80%   | >80%      | >80%   |
| Levonorgestrel                       |              | >80% | >80%   | >80% | >80%   | >80%   | >80%      | >80%   |
| Metoprolol                           |              | >80% | >80%   | >80% | >80%   | >80%   | >80%      | >80%   |
| Oxazepam                             |              | >80% | >80%   | >80% | 20-80% | >80%   | >80%      | >80%   |
| Propranolol                          |              | >80% | >80%   | >80% | >80%   | >80%   | >80%      | >80%   |
| Sertraline                           |              | >80% | <20%   | >80% | 20-80% | <20%   | >80%      | >80%   |
| Sulfamethoxazole                     |              | >80% | >80%   | >80% | >80%   | >80%   | >80%      | >80%   |
| Trimethoprim                         |              | >80% | 20-80% | >80% | >80%   | 20-80% | >80%      | >80%   |

Adapted from: The Swedish Environmental Protection Agency [125].

**Table S8** Technical assessment of combined treatment technologies for pharmaceuticals

|                               | <b>UF</b> | <b>GAC</b> | <b>PAC</b> | <b>BAF</b> | <b>Ozone</b> | <b>PAC-UF</b> | <b>Ozone-BAF</b> | <b>UF-BAF</b> |
|-------------------------------|-----------|------------|------------|------------|--------------|---------------|------------------|---------------|
| Robustness                    | +++       | +++        | +++        | ++         | +++          | +++           | +++              | +++           |
| Availability in full-scale    | +++       | +++        | +++        | +++        | +++          | not tested    | +++              | not tested    |
| Easy to maintain              | ++        |            |            |            |              |               |                  |               |
| Footprint                     | ++        | ++         | ++         | ++         | +++          | ++            | ++               | ++            |
| Residue with disposal problem | no        | no         | yes        | no         | yes          | yes           | no               | no            |

Adapted from: The Swedish Environmental Protection Agency [125].



**Table S9** Comparison for MBR, OMBR and MDBR in wastewater treatment (Modified from Pathak et al. [93])

| Parameters/description                   | MBR                                                                                                                                         | OMBR                                                                                                                                                 | MDBR                                                                                                                                                      |
|------------------------------------------|---------------------------------------------------------------------------------------------------------------------------------------------|------------------------------------------------------------------------------------------------------------------------------------------------------|-----------------------------------------------------------------------------------------------------------------------------------------------------------|
| Membrane type                            | Low-pressure MF/UF membranes are employed.<br>(MF MWCO = 1000 kDa)<br>(UF MWCO = 10 - 100 kDa)<br>Liquid (permeate water) inside the lumen. | Forward osmosis (FO) semi-permeable membranes are used.<br>FO (MWCO = 0,1 - 2 kDa)<br><br>Liquid (permeate water) inside the lumen.                  | Hydrophobic membrane distillation membrane (MD) is used.<br>MD (MWCO < 150 Dalton)<br><br>Vapor phase (permeate) inside the lumen.                        |
| Removal mechanism                        | Size exclusion is principal removal mechanism.                                                                                              | Steric hindrance and electrostatic repulsion are principal removal mechanisms.                                                                       | Steric hindrance is the principal removal mechanism.                                                                                                      |
| Membrane process influence on economy    | In MBR, the design has evolved to continually improve the economy of energy required for scouring, backwashing and aeration.                | In OMBR, fine bubble diffusion for oxygen transfer and a longer interval between backwashing and cleaning should require less energy.                | In MDBR, the waste heat source can be utilized, thus saving energy and minimizing GHG emission.<br>MD utilizes waste heat directly with a heat exchanger. |
| Energy consumption (kWh/m <sup>3</sup> ) | In MBRs total energy estimate is 4.2 kWh/m <sup>3</sup> water treated.                                                                      | In OMBR total energy estimate is 2.8 kWh/m <sup>3</sup> water treated.                                                                               | Electrical energy requirement for RO would increase as feed solution salinity increases whereas MD is only minimally affected by feed solution salinity.  |
| OMP removal                              | MF/UF membrane of the MBR process is commercialized.<br>Hydrophilic OMP removal is too low.                                                 | Membrane stability is major concern.<br>CTA membrane can operate in narrow pH range and stability of membrane due to biodegradation being a concern. | Complete rejection of inorganic salts and OMPs.<br>Ammonia and CO <sub>2</sub> can seep through MD membrane.                                              |

**Table S10** Summary of recently published OMBR studies (Modified from Pathak et al. [93])

| <b>FO membrane</b>                                                                                         | <b>Draw solution</b> | <b>HRT (h)</b> | <b>SRT (d)</b> | <b>MLSS (g/l)</b> | <b>Water flux (LMH)</b> | <b>Bioreactor conductivity</b> | <b>OMP</b>                       | <b>Removal (%)</b> | <b>Ref</b>           |
|------------------------------------------------------------------------------------------------------------|----------------------|----------------|----------------|-------------------|-------------------------|--------------------------------|----------------------------------|--------------------|----------------------|
| Plate-and-frame FO membrane Hydration Technology Innovations (HTI, USA) made of cellulose triacetate (CTA) | 1 M NaCl             | 25.2<br>5      | 30             | --                | 11.88                   | --                             | CBZ<br>100<br>(µg/L)             | 93.27<br>±3.77%    | Yao et al., [126]    |
| HTI-CTA FO membrane                                                                                        | 0.75 M NaCl          | 30             | 70             | 3.5               | 7–5.5                   | 2.5<br>(g/L)                   | Caffeine<br>Atrazine<br>Atenolol | 94<br>51<br>100    | Pathak et al., [127] |

**Table S11** Summary of recently published OMBR studies

| Feed Solution        | MD Membrane      | Temperature |             | HRT (h) | SRT (d) | MLSS (g/L) | Water flux (LMH) | DO (mg/L) | OMP                                                                                                                                                                                                                                                                                                                                                                                                         | Removal (%)                                                                                                                             | Ref                   |
|----------------------|------------------|-------------|-------------|---------|---------|------------|------------------|-----------|-------------------------------------------------------------------------------------------------------------------------------------------------------------------------------------------------------------------------------------------------------------------------------------------------------------------------------------------------------------------------------------------------------------|-----------------------------------------------------------------------------------------------------------------------------------------|-----------------------|
|                      |                  | Feed °C     | Permeate °C |         |         |            |                  |           |                                                                                                                                                                                                                                                                                                                                                                                                             |                                                                                                                                         |                       |
| Synthetic wastewater | PTFE membrane    | 45          | 20          | 4 d     | --      | 10         | --               | --*       | Amtriptyline, Atrazine<br>Bisphenol A, Caffeine<br>Carazolol, Carbamazepine<br>Clozapine, Diazinon<br>Diclofenac, Diuron<br>Gemfibrozil, Ibuprofen<br>Ketoprofen, Linuron<br>Naproxen, Paracetamol<br>Phenylphenol, Primidone<br>Propylparaben, Simazine<br>Sulfamethoxazole, TCEP<br>Triamterene, Triclocarban<br>Triclosan, Trimethoprim                                                                  | 99, 74<br>85, 99<br>97, 90<br>99, 99<br>75, 99<br>99, 99<br>99, 93<br>97, 99<br>80, 99<br>91, 79<br>89, 92<br>98, 95<br>85, 99          | Song et al., [128]    |
| Synthetic wastewater | PTFE side stream | 40          | 14          | 9.6 d   |         | 5.3        | 1.2              | 2.8       | 17 $\alpha$ -Ethinylestradiol<br>17 $\beta$ -Estradiol<br>17 $\beta$ -Estradiol-17- acetate<br>4-Tert-butyphenol<br>Ametryn, Amitriptyline<br>Atrazine, Benzophenone<br>Carbamazepine, Clofibrilic acid<br>Diclofenac, Estriol, Estrone<br>Fenoprop, Gemfibrozil<br>Ibuprofen, Ketoprofen<br>Naproxen, Octocrylene<br>Oxybenzone,<br>Pentachlorophenol<br>Primidone, Propoxure<br>Salicylic acid, Triclosan | 99<br>100<br>100<br>98<br>99, 99<br>96, 97<br>96, 100<br>95, 98,<br>100<br>97, 98<br>100, 99<br>100, 97<br>99, 97<br>100, 100<br>96, 98 | Wijekoon et al., [95] |

**Table S12** Comparison of the performance of four membrane processes: aerobic MBR, anaerobic MBR, biofilm MBR, and FO-MBR in terms of energy demand and their impact on climate change (modified from Krzeminski et al., [96] and Pathak et al, [93]).

| <b>Process type</b> | <b>Energy related emissions</b> | <b>Climate change impact</b> |
|---------------------|---------------------------------|------------------------------|
| <b>MBR</b>          | High                            | High                         |
| <b>AnMBR</b>        | Low                             | High                         |
| <b>BF-MBR</b>       | High/medium                     | High/medium                  |
| <b>FO-MBR</b>       | Medium                          | Medium                       |
